# Supplementary material for: Recovering high value-added anthocyanins from blueberry pomace with ultrasound-assisted extraction
Source: PubMed Central journal article supplement — Food Chem X. 2022 Oct 13;16:100476. doi: 10.1016/j.fochx.2022.100476 (PMC9579799; doi:10.1016/j.fochx.2022.100476), 2022-10-13
Supplement: mmc1.pdf [file mmc1.pdf]

## Supplementary materials

**Fig.S.1** Flowchart for the implementation of cation column for the separation of anthocyanins.

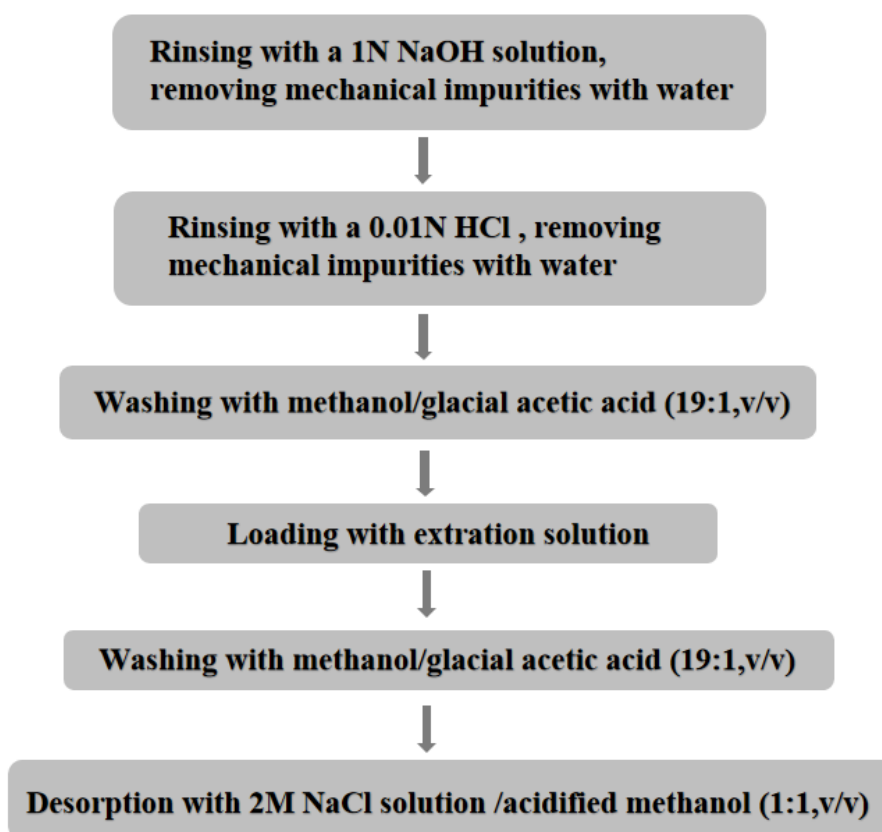

**Fig.S.2** 2D Contours and 3D surface plots for the effects of ultrasound power, extraction time and temperature on the yield of anthocyanins.

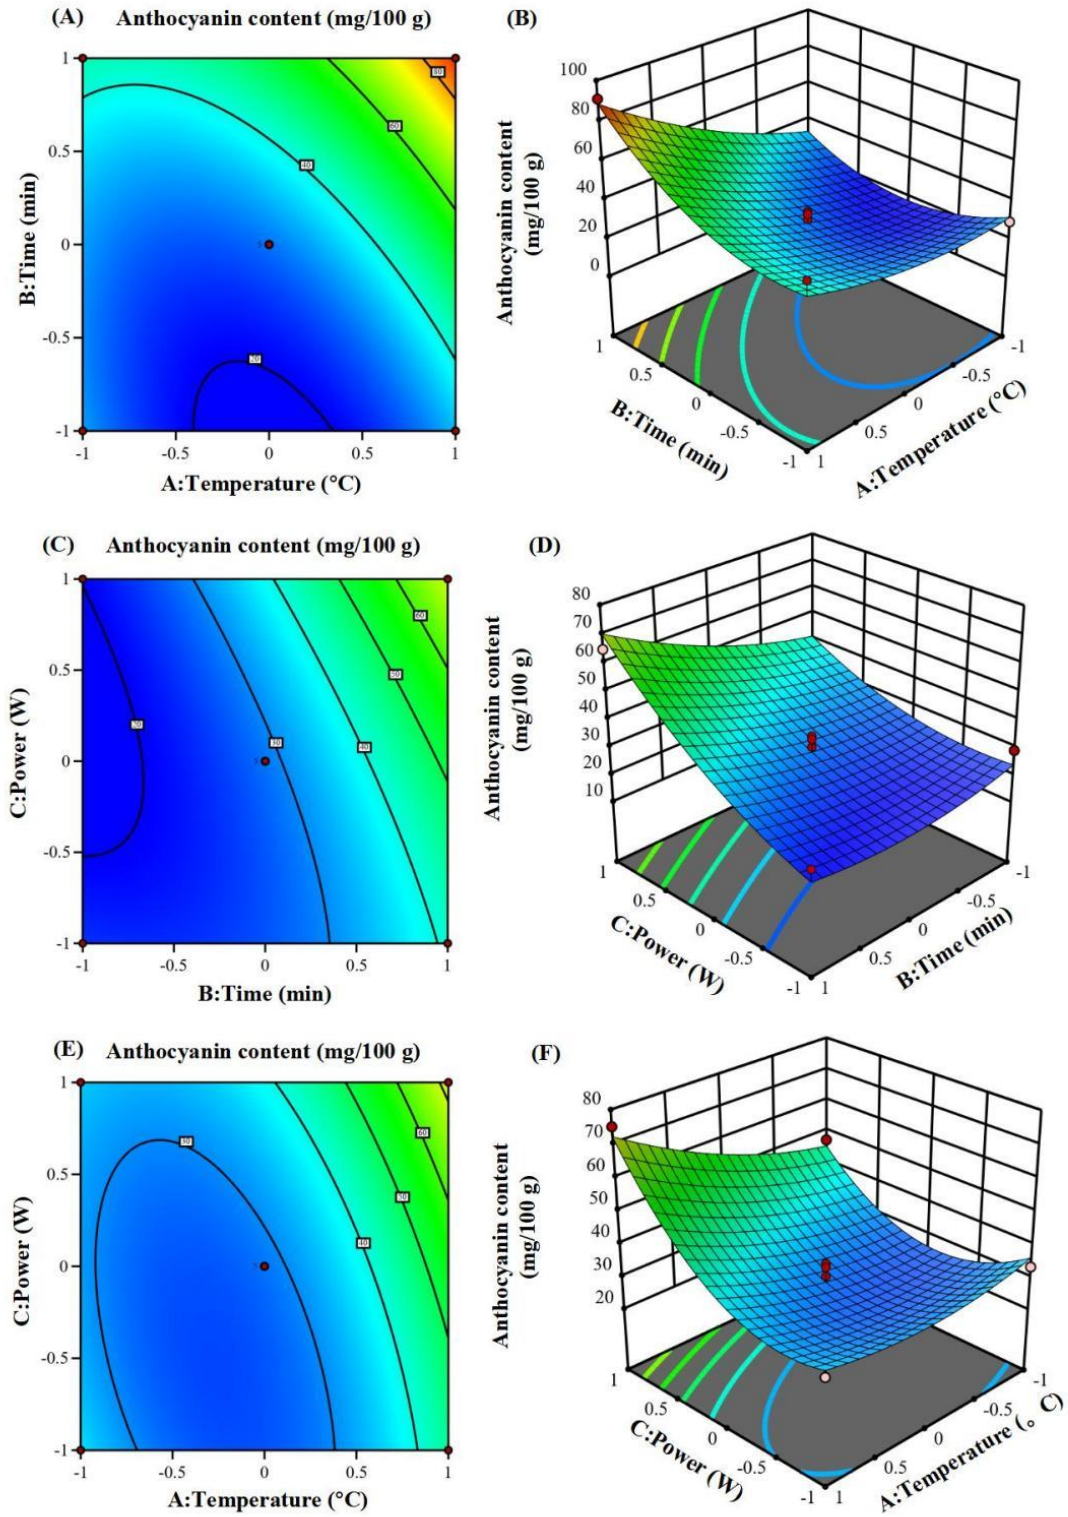

**Fig.S.3** Changes in the content of 13 anthocyanins in 17 groups under different treatment conditions for Box-Behnken design.

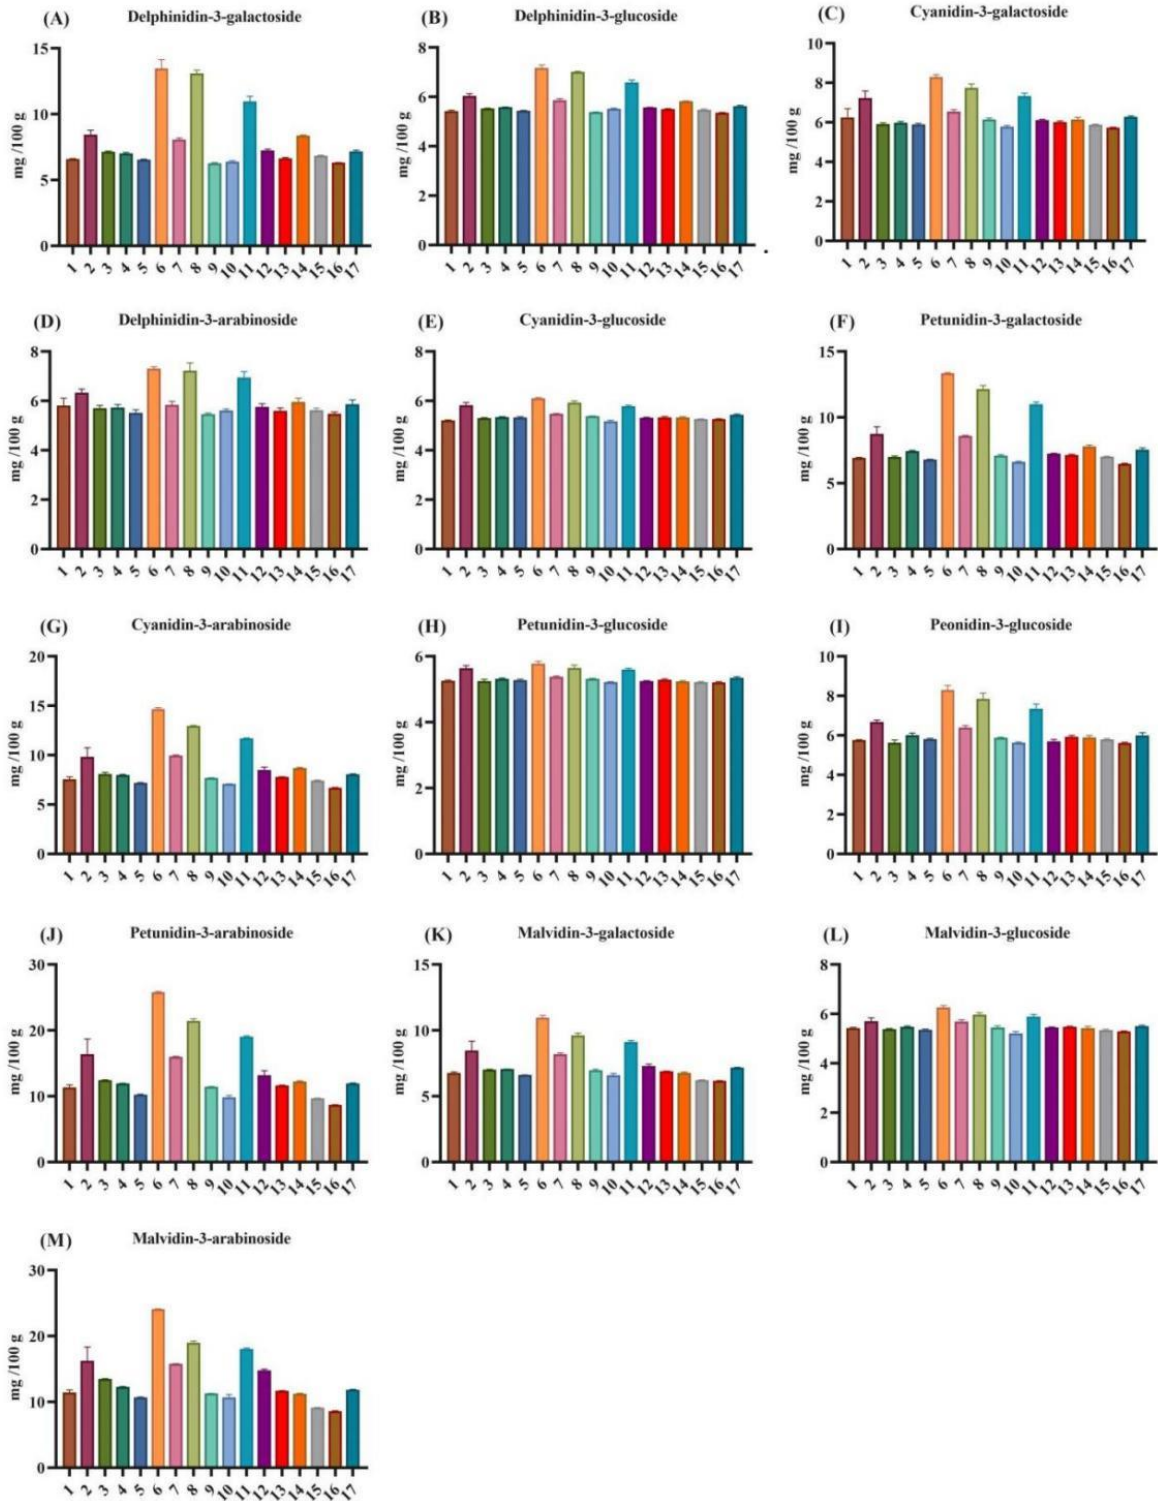

**Table.S.1** Contents of detected 13 anthocyanins in the samples for Box-Behnken design.

|    | <b>Del-3-gal</b>                    | <b>Del-3-glc</b>          | <b>Cy-3-gal</b>         | <b>Del-3-ara</b>        | <b>Cy-3-glc</b>          | <b>Pet-3-gal</b>           | <b>Cy-3-ara</b>           | <b>Pet-3-glc</b>        | <b>Peo-3-glc</b>        | <b>Pet-3-ara</b>          | <b>Mal-3-gal</b>         | <b>Mal-3-glc</b>         | <b>Mal-3-ara</b>         |
|----|-------------------------------------|---------------------------|-------------------------|-------------------------|--------------------------|----------------------------|---------------------------|-------------------------|-------------------------|---------------------------|--------------------------|--------------------------|--------------------------|
| 1  | 6.59±0.04 <sup>def</sup>            | 5.43±0.07 <sup>ghi</sup>  | 6.26±0.76 <sup>de</sup> | 5.82±0.51 <sup>c</sup>  | 5.22±0.02 <sup>gh</sup>  | 6.92±0.07 <sup>ghij</sup>  | 7.56±0.4 <sup>ghi</sup>   | 5.26±0.04 <sup>cd</sup> | 5.76±0.04 <sup>f</sup>  | 11.34±0.66 <sup>efg</sup> | 6.77±0.11 <sup>def</sup> | 5.43±0.04 <sup>de</sup>  | 11.44±0.62 <sup>f</sup>  |
| 2  | 8.46±0.55 <sup>c</sup>              | 6.04±0.16 <sup>d</sup>    | 7.23±0.62 <sup>c</sup>  | 6.34±0.25 <sup>b</sup>  | 5.83±0.18 <sup>bc</sup>  | 8.74±0.96 <sup>d</sup>     | 9.81±1.62 <sup>d</sup>    | 5.64±0.15 <sup>b</sup>  | 6.68±0.18 <sup>d</sup>  | 16.40±3.95 <sup>d</sup>   | 8.48±1.22 <sup>c</sup>   | 5.70±0.25 <sup>c</sup>   | 16.24±3.63 <sup>c</sup>  |
| 3  | 7.15±0.09 <sup>d</sup>              | 5.53±0.02 <sup>fgh</sup>  | 5.92±0.1 <sup>e</sup>   | 5.71±0.18 <sup>c</sup>  | 5.31±0.03 <sup>fg</sup>  | 7.00±0.13 <sup>fghij</sup> | 8.07±0.32 <sup>efg</sup>  | 5.25±0.09 <sup>cd</sup> | 5.63±0.25 <sup>f</sup>  | 12.44±0.07 <sup>e</sup>   | 7.00±0.07 <sup>de</sup>  | 5.39±0.03 <sup>def</sup> | 13.49±0.10 <sup>de</sup> |
| 4  | 7.00±0.15 <sup>de</sup>             | 5.58±0.01 <sup>fg</sup>   | 5.98±0.13 <sup>e</sup>  | 5.74±0.2 <sup>c</sup>   | 5.35±0.05 <sup>ef</sup>  | 7.44±0.08 <sup>efg</sup>   | 7.99±0.11 <sup>efgh</sup> | 5.32±0.04 <sup>cd</sup> | 6.02±0.18 <sup>ef</sup> | 11.93±0.05 <sup>ef</sup>  | 7.06±0.01 <sup>de</sup>  | 5.48±0.06 <sup>de</sup>  | 12.30±0.07 <sup>ef</sup> |
| 5  | 6.54±0.06 <sup>def</sup>            | 5.44±0.03 <sup>ghi</sup>  | 5.89±0.11 <sup>e</sup>  | 5.53±0.2 <sup>c</sup>   | 5.33±0.05 <sup>efg</sup> | 6.78±0.06 <sup>hij</sup>   | 7.19±0.06 <sup>hij</sup>  | 5.28±0.04 <sup>cd</sup> | 5.82±0.06 <sup>f</sup>  | 10.25±0.12 <sup>fgh</sup> | 6.60±0.03 <sup>ef</sup>  | 5.36±0.05 <sup>def</sup> | 10.67±0.11 <sup>fg</sup> |
| 6  | 13.47±1.17 <sup>a</sup>             | 7.17±0.22 <sup>a</sup>    | 8.30±0.21 <sup>a</sup>  | 7.3±0.14 <sup>a</sup>   | 6.11±0.04 <sup>a</sup>   | 13.35±0.11 <sup>a</sup>    | 14.67±0.24 <sup>a</sup>   | 5.78±0.12 <sup>a</sup>  | 8.30±0.41 <sup>a</sup>  | 25.78±0.23 <sup>a</sup>   | 10.99±0.28 <sup>a</sup>  | 6.26±0.14 <sup>a</sup>   | 24.12±0.03 <sup>a</sup>  |
| 7  | 8.07±0.21 <sup>c</sup>              | 5.87±0.11 <sup>e</sup>    | 6.55±0.16 <sup>d</sup>  | 5.84±0.25 <sup>c</sup>  | 5.48±0.01 <sup>d</sup>   | 8.6±0.05 <sup>d</sup>      | 9.95±0.14 <sup>d</sup>    | 5.38±0.05 <sup>c</sup>  | 6.39±0.18 <sup>de</sup> | 15.99±0.10 <sup>d</sup>   | 8.21±0.14 <sup>c</sup>   | 5.70±0.12 <sup>c</sup>   | 15.77±0.07 <sup>c</sup>  |
| 8  | 13.10±0.42 <sup>a</sup>             | 7.01±0.05 <sup>b</sup>    | 7.75±0.33 <sup>b</sup>  | 7.22±0.55 <sup>a</sup>  | 5.94±0.12 <sup>b</sup>   | 12.14±0.49 <sup>b</sup>    | 12.98±0.04 <sup>b</sup>   | 5.65±0.16 <sup>b</sup>  | 7.85±0.49 <sup>b</sup>  | 21.47±0.49 <sup>b</sup>   | 9.62±0.31 <sup>b</sup>   | 5.98±0.12 <sup>b</sup>   | 19.00±0.04 <sup>b</sup>  |
| 9  | 6.27±0.09 <sup>f</sup>              | 5.38±0.01 <sup>hi</sup>   | 6.15±0.12 <sup>de</sup> | 5.46±0.08 <sup>c</sup>  | 5.38±0.02 <sup>def</sup> | 7.08±0.15 <sup>fghi</sup>  | 7.69±0.04 <sup>fghi</sup> | 5.32±0.02 <sup>cd</sup> | 5.88±0.06 <sup>f</sup>  | 11.42±0.08 <sup>efg</sup> | 6.96±0.14 <sup>de</sup>  | 5.46±0.10 <sup>de</sup>  | 11.25±0.08 <sup>f</sup>  |
| 10 | 6.38±0.15 <sup>ef</sup>             | 5.52±0.04 <sup>fghi</sup> | 5.78±0.11 <sup>e</sup>  | 5.61±0.11 <sup>c</sup>  | 5.18±0.07 <sup>gh</sup>  | 6.61±0.1 <sup>ij</sup>     | 7.07±0.04 <sup>ij</sup>   | 5.22±0.03 <sup>d</sup>  | 5.64±0.06 <sup>f</sup>  | 9.81±0.53 <sup>gh</sup>   | 6.58±0.25 <sup>ef</sup>  | 5.22±0.13 <sup>f</sup>   | 10.67±0.77 <sup>fg</sup> |
| 11 | 10.98±0.65 <sup>b</sup>             | 6.58±0.17 <sup>c</sup>    | 7.34±0.25 <sup>bc</sup> | 6.95±0.41 <sup>a</sup>  | 5.78±0.07 <sup>c</sup>   | 11.00±0.28 <sup>c</sup>    | 11.7±0.08 <sup>c</sup>    | 5.60±0.07 <sup>b</sup>  | 7.36±0.41 <sup>c</sup>  | 19.07±0.23 <sup>c</sup>   | 9.12±0.18 <sup>b</sup>   | 5.89±0.14 <sup>b</sup>   | 18.06±0.22 <sup>b</sup>  |
| 12 | 7.2454±0.18 <sup>d</sup>            | 5.57±0.01 <sup>fg</sup>   | 6.11±0.08 <sup>de</sup> | 5.75±0.22 <sup>c</sup>  | 5.32±0.03 <sup>efg</sup> | 7.24±0.06 <sup>fgh</sup>   | 8.47±0.56 <sup>ef</sup>   | 5.25±0.03 <sup>cd</sup> | 5.70±0.17 <sup>f</sup>  | 13.17±1.18 <sup>e</sup>   | 7.29±0.25 <sup>d</sup>   | 5.45±0.03 <sup>de</sup>  | 14.77±0.31 <sup>cd</sup> |
| 13 | 6.64±0.11 <sup>d<sup>ef</sup></sup> | 5.51±0.03 <sup>fghi</sup> | 6.02±0.09 <sup>e</sup>  | 5.60±0.2 <sup>c</sup>   | 5.34±0.05 <sup>efg</sup> | 7.14±0.1 <sup>fghi</sup>   | 7.79±0.02 <sup>fghi</sup> | 5.29±0.05 <sup>cd</sup> | 5.93±0.13 <sup>f</sup>  | 11.61±0.14 <sup>efg</sup> | 6.89±0.02 <sup>de</sup>  | 5.48±0.05 <sup>de</sup>  | 11.66±0.08 <sup>f</sup>  |
| 14 | 8.37±0.09 <sup>c</sup>              | 5.82±0.02 <sup>e</sup>    | 6.15±0.18 <sup>de</sup> | 5.96±0.27 <sup>bc</sup> | 5.33±0.05 <sup>efg</sup> | 7.80±0.19 <sup>e</sup>     | 8.68±0.13 <sup>e</sup>    | 5.24±0.04 <sup>cd</sup> | 5.90±0.17 <sup>f</sup>  | 12.24±0.18 <sup>e</sup>   | 6.76±0.14 <sup>def</sup> | 5.43±0.11 <sup>de</sup>  | 11.21±0.19 <sup>f</sup>  |
| 15 | 6.85±0.06 <sup>def</sup>            | 5.48±0.04 <sup>fghi</sup> | 5.88±0.05 <sup>e</sup>  | 5.62±0.15 <sup>c</sup>  | 5.26±0.02 <sup>fgh</sup> | 7.01±0.07 <sup>fghij</sup> | 7.43±0.06 <sup>ghij</sup> | 5.22±0.02 <sup>d</sup>  | 5.80±0.08 <sup>f</sup>  | 9.69±0.04 <sup>gh</sup>   | 6.20±0.08 <sup>f</sup>   | 5.35±0.06 <sup>def</sup> | 9.11±0.09 <sup>gh</sup>  |
| 16 | 6.30±0.04 <sup>ef</sup>             | 5.36±0.01 <sup>i</sup>    | 5.73±0.05 <sup>e</sup>  | 5.48±0.12 <sup>c</sup>  | 5.27±0.02 <sup>fgh</sup> | 6.46±0.07 <sup>j</sup>     | 6.69±0.04 <sup>j</sup>    | 5.21±0.03 <sup>d</sup>  | 5.62±0.07 <sup>f</sup>  | 8.70±0.03 <sup>h</sup>    | 6.17±0.04 <sup>f</sup>   | 5.29±0.03 <sup>ef</sup>  | 8.59±0.10 <sup>h</sup>   |
| 17 | 7.16±0.2 <sup>d</sup>               | 5.63±0.05 <sup>f</sup>    | 6.28±0.10 <sup>de</sup> | 5.87±0.3 <sup>bc</sup>  | 5.44±0.06 <sup>de</sup>  | 7.54±0.26 <sup>ef</sup>    | 8.04±0.10 <sup>efg</sup>  | 5.35±0.06 <sup>c</sup>  | 6.01±0.23 <sup>e</sup>  | 11.93±0.13 <sup>ef</sup>  | 7.15±0.08 <sup>de</sup>  | 5.51±0.06 <sup>d</sup>   | 11.81±0.19 <sup>f</sup>  |

Data are expressed as mean ± SD, n = 3. Different letters within column denote statistical difference at p < 0.05. Del-3-gal, Delphinidin-3-galactoside; Del-3-glc, Delphinidin-3-glucoside; Cy-3-gal, Cyanidin-3-galactoside; Del-3-ara, Delphinidin-3-arabinoside; Cy-3-glc, Cyanidin-3-glucosid; Pet-3-gal, Petunidin-3-galactoside; Cy-3-ara, Cyanidin-3-arabinoside; Pet-3-glc, Petunidin-3-glucoside; Peo-3-glc, Peonidin-3-glucoside; Pet-3-ara, Petunidin-3-arabinoside; Mal-3-gal, Malvidin-3-galactoside; Mal-3-glc, Malvidin-3-glucoside; Mal-3-ara, Malvidin-3-arabinoside.
